# Supplementary material for: RNA-Seq transcriptome analysis shows anti-tumor actions of melatonin in a breast cancer xenograft model
Source: PubMed Central journal article supplement (PMC6353949; doi:10.1038/s41598-018-37413-w), 2019-01-30
Supplement: 41598_2018_37413_MOESM1_ESM.pdf [file 41598_2018_37413_MOESM1_ESM.pdf]

## **RNA-Seq transcriptome analysis shows anti-tumor actions of melatonin in a breast cancer xenograft model**

Bruna Victorasso Jardim-Perassi; Pâmela A. Alexandre; Nathalia M. Sonehara; Rubens de Paula-Junior; Osvaldo Reis Júnior; Heidge Fukumasu; Roger Chammas; Luiz Lehmann Coutinho; Debora Aparecida Pires de Campos Zuccari

### **Supplementary figure legends**

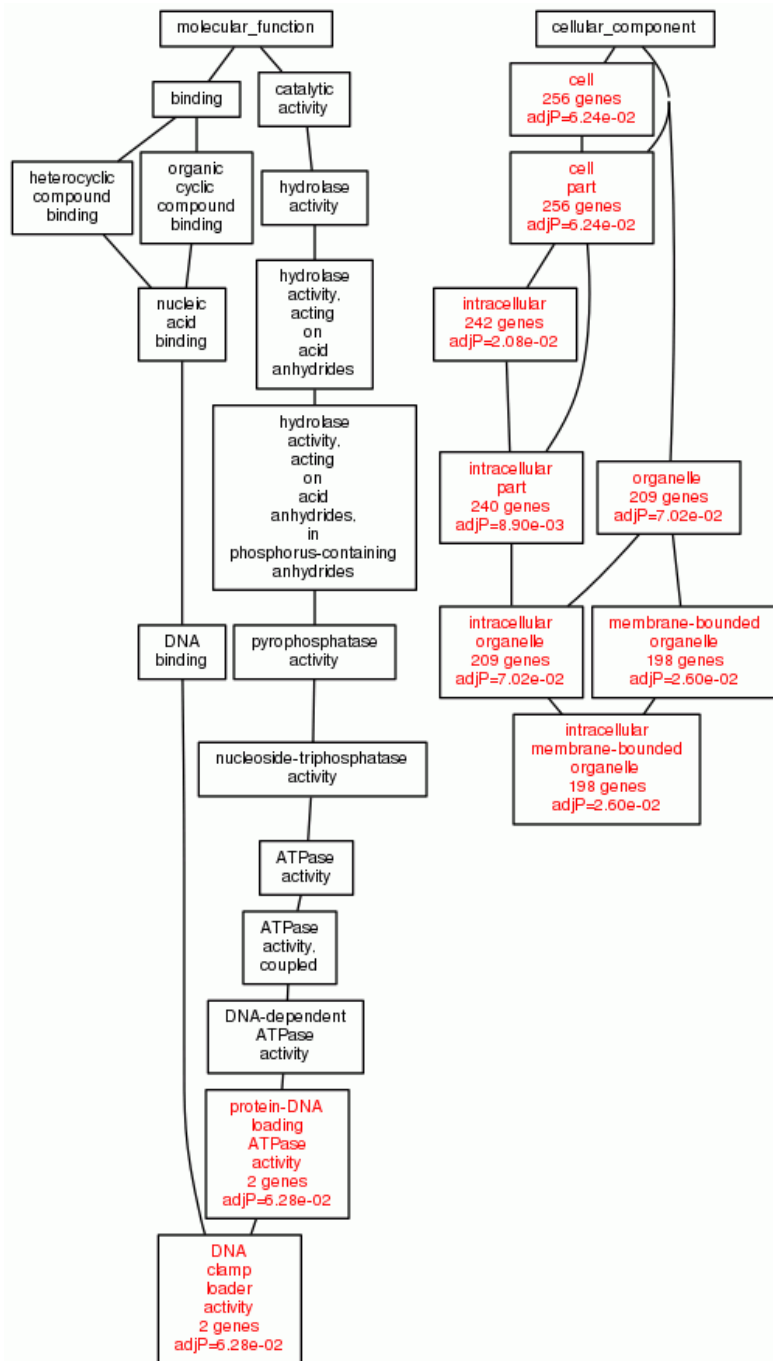

**Supplementary figure S1:** Gene ontology (GO) analysis of connected genes in the MDA-MB-21 human breast cancer cells of the melatonin-treated group. GO analysis was performed using Gene Set Analysis Toolkit software ([www.bioinfo.vanderbilt.edu/webgestalt](http://www.bioinfo.vanderbilt.edu/webgestalt)). The enriched GO categories are shown in red (hypergeometric;  $P < 0.1$ ; red) and their nonenriched parents are shown in black.



**Supplementary figure S2 caption:** Gene ontology (GO) analysis of connected genes in the MDA-MB-21 human breast cancer cells of the control group. GO analysis was performed using Gene Set Analysis Toolkit software ([www.bioinfo.vanderbilt.edu/webgestalt](http://www.bioinfo.vanderbilt.edu/webgestalt)). The enriched GO categories are shown in red (hypergeometric;  $P < 0.1$ ; red) and their nonenriched parents are shown in black.

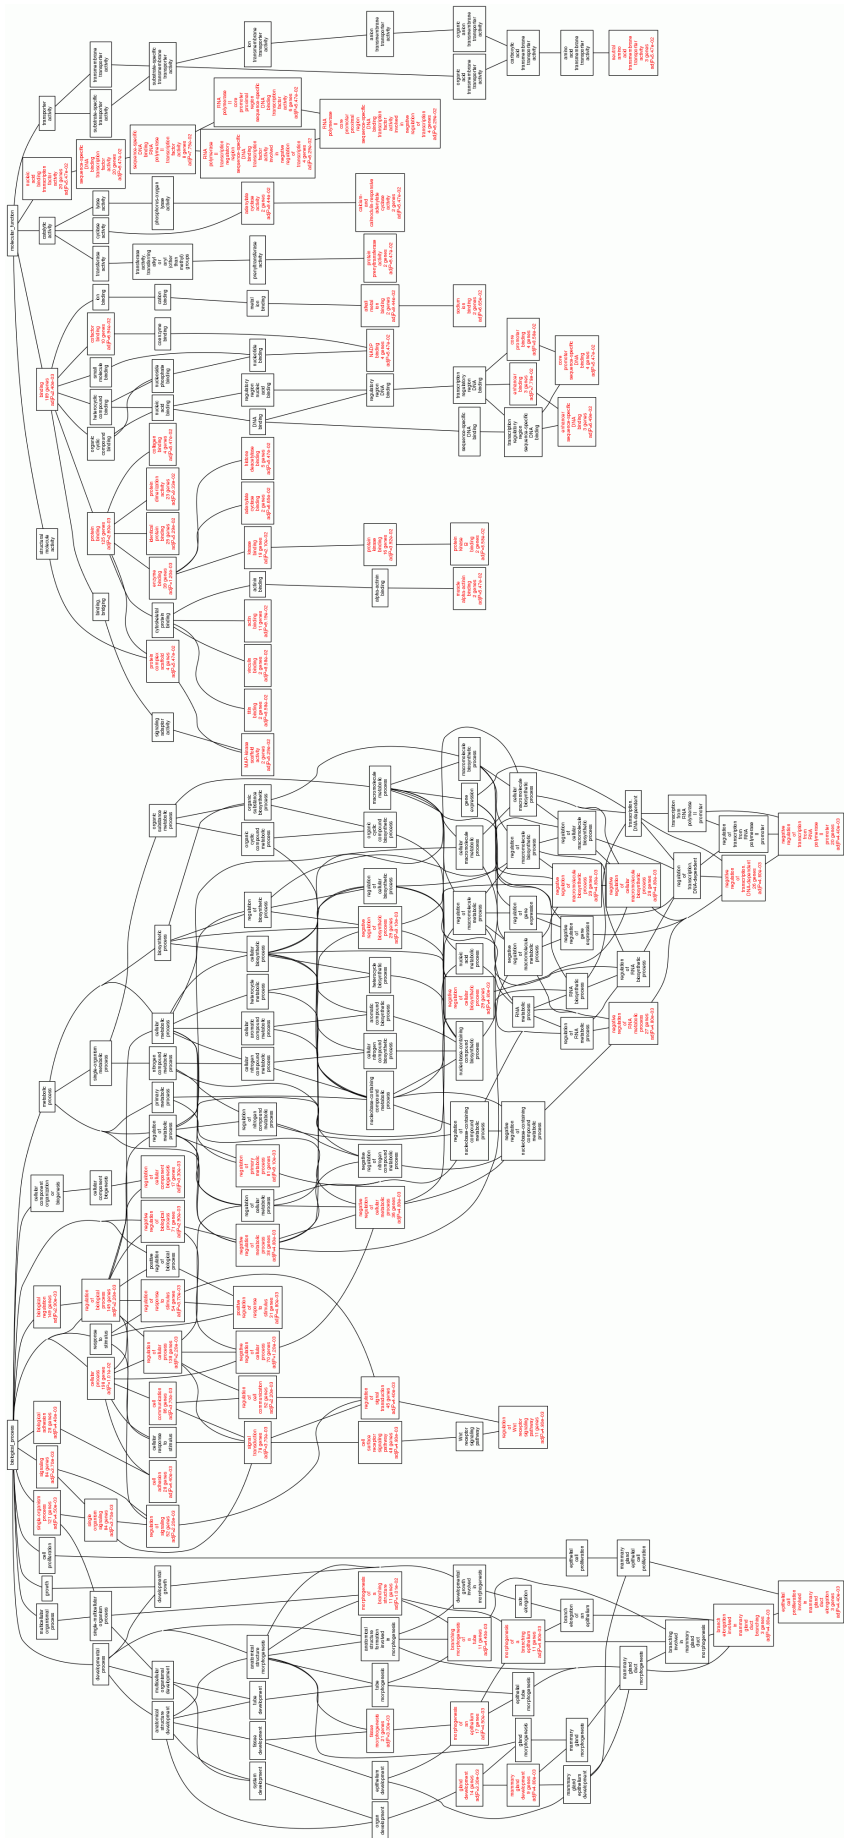

**Supplementary figure S3 caption:** Gene ontology (GO) analysis of connected genes in murine cells, which represent the tumor microenvironment (TME) of the melatonin-treated group. GO analysis was performed using Gene Set Analysis Toolkit software ([www.bioinfo.vanderbilt.edu/webgestalt](http://www.bioinfo.vanderbilt.edu/webgestalt)). The enriched GO categories are shown in red (hypergeometric;  $P < 0.1$ ; red) and their nonenriched parents are shown in black.

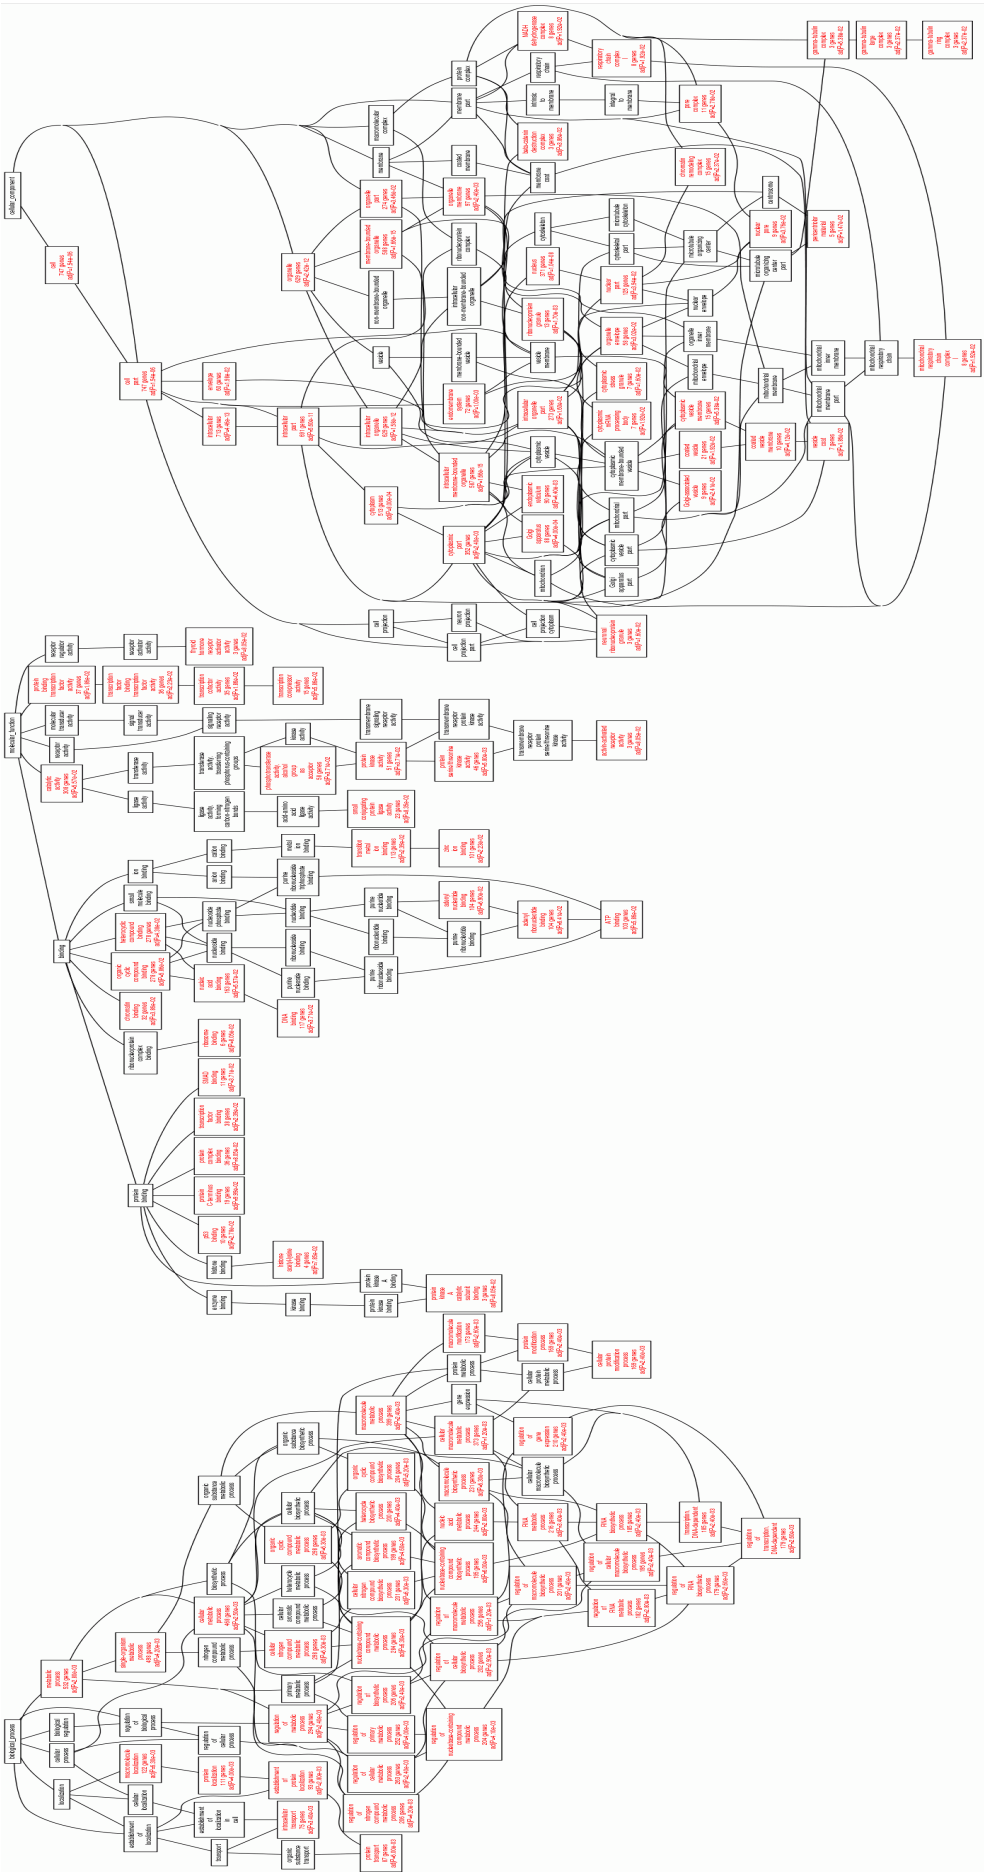

**Supplementary figure S4 caption:** Gene ontology (GO) analysis of connected genes in murine cells, which represent the tumor microenvironment (TME) of the control group. GO analysis was performed using Gene Set Analysis Toolkit software ([www.bioinfo.vanderbilt.edu/webgestalt](http://www.bioinfo.vanderbilt.edu/webgestalt)). The enriched GO categories are shown in red (hypergeometric;  $P < 0.1$ ; red) and their nonenriched parents are shown in black.







**Supplementary figure S6 caption:** Gene ontology (GO) analysis of darkoliver co-expressed gene module altered by melatonin treatment in the murine cells, which represent the tumor microenvironment (TME). GO analysis was performed using Gene Set Analysis Toolkit software ([www.bioinfo.vanderbilt.edu/webgestalt](http://www.bioinfo.vanderbilt.edu/webgestalt)). The enriched GO categories are shown in red (hypergeometric;  $P < 0.1$ ; red) and their nonenriched parents are shown in black.

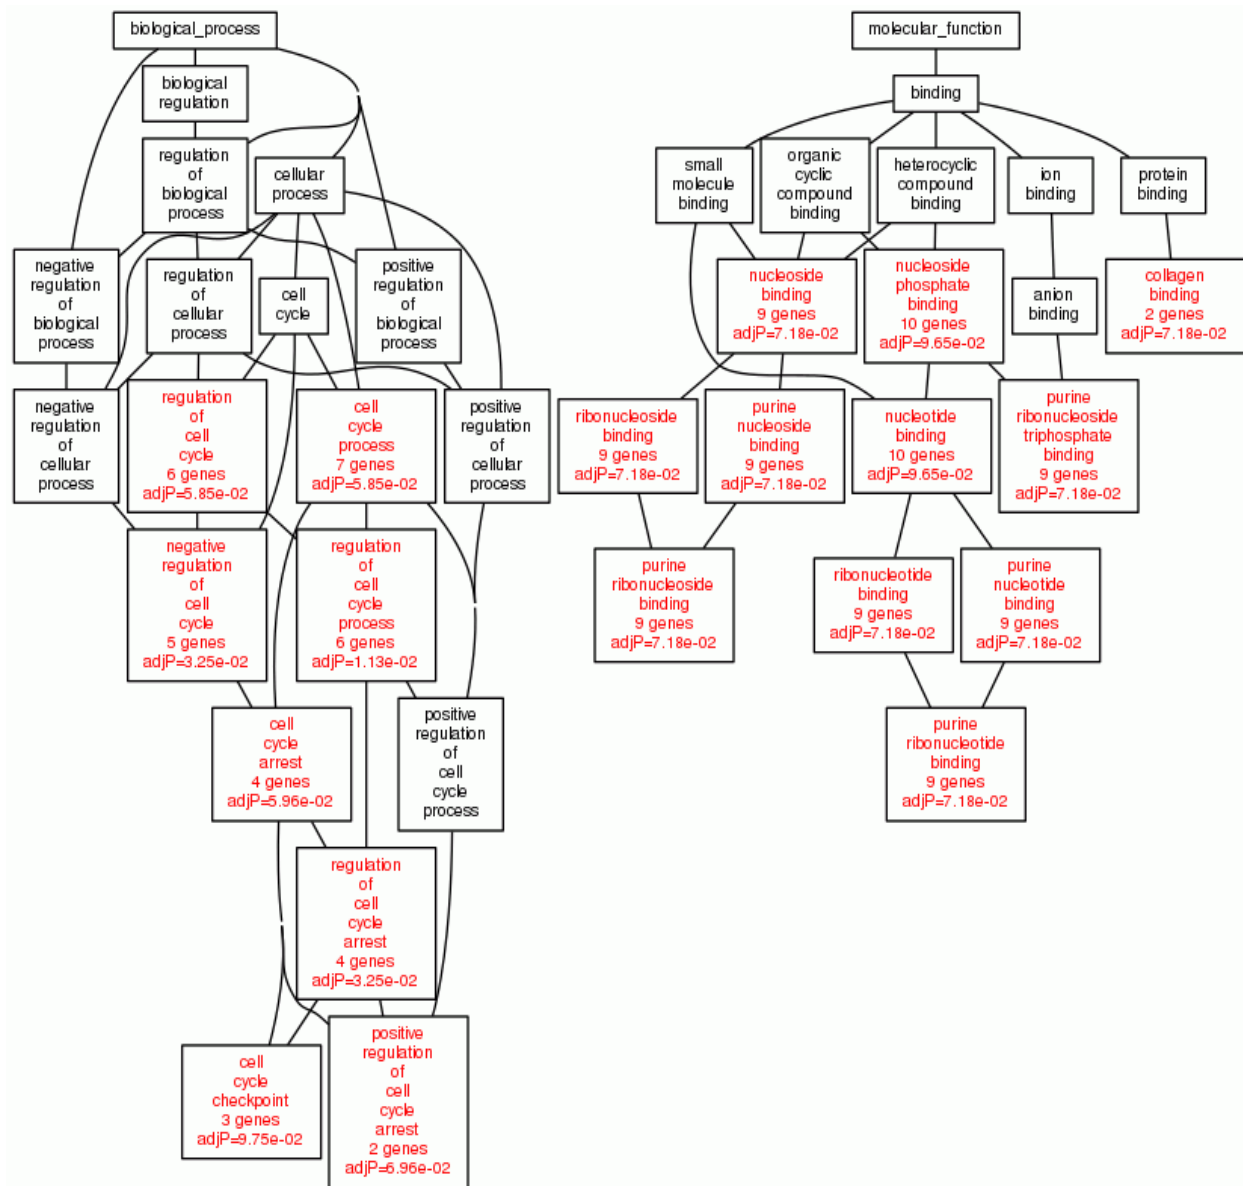

**Supplementary figure S7 caption:** Gene ontology (GO) analysis of yellowgreen co-expressed gene module altered by melatonin treatment in the murine cells, which represent the tumor microenvironment (TME). GO analysis was performed using Gene Set Analysis Toolkit software ([www.bioinfo.vanderbilt.edu/webgestalt](http://www.bioinfo.vanderbilt.edu/webgestalt)). The enriched GO categories are shown in red (hypergeometric;  $P < 0.1$ ; red) and their nonenriched parents are shown in black.

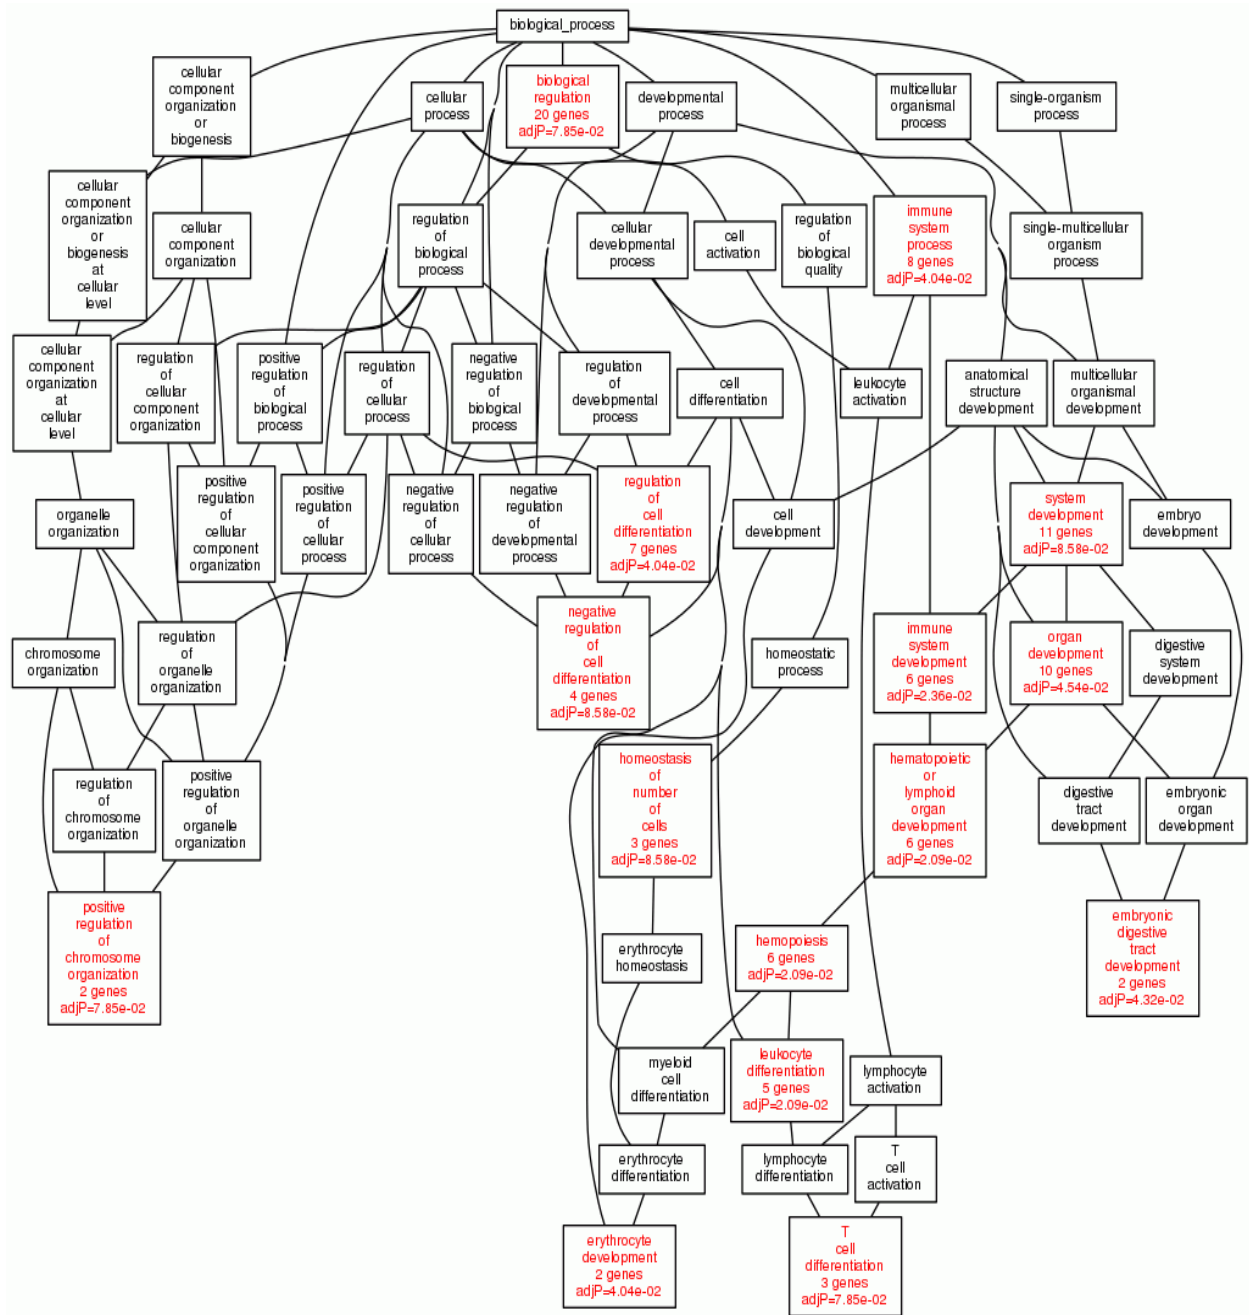

**Supplementary figure S8 caption:** Gene ontology (GO) analysis of orange-red co-expressed gene module altered by melatonin treatment in the murine cells, which represent the tumor microenvironment (TME). GO analysis was performed using Gene Set Analysis Toolkit software ([www.bioinfo.vanderbilt.edu/webgestalt](http://www.bioinfo.vanderbilt.edu/webgestalt)). The enriched GO categories are shown in red (hypergeometric;  $P < 0.1$ ; red) and their nonenriched parents are shown in black.

### Electrophoresis File Run Summary

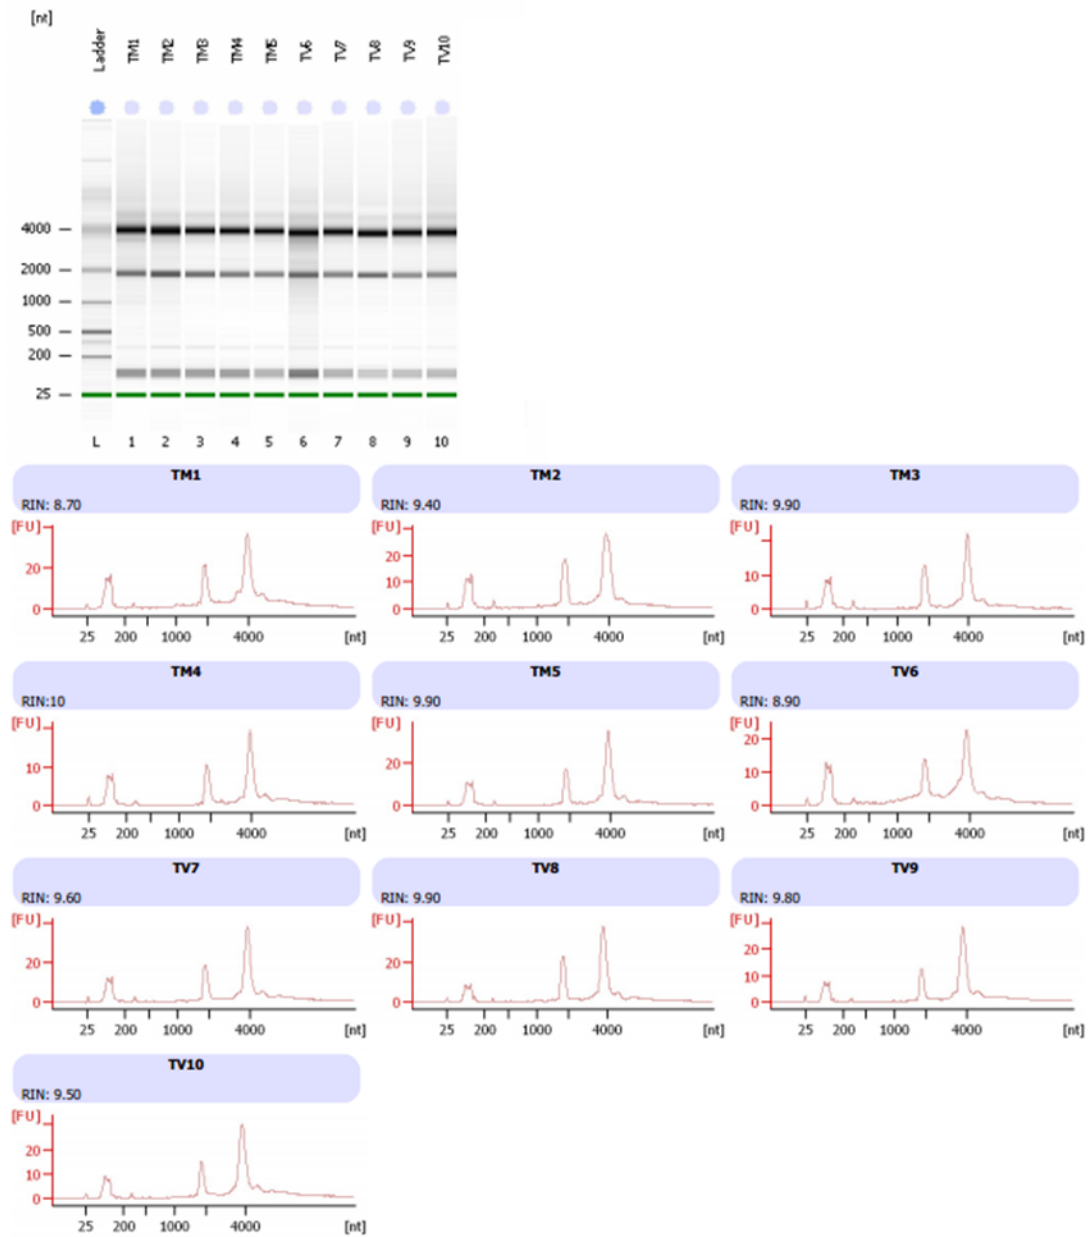

**Supplementary figure S9.** Bioanalyzer electropherograms showing the RNA quality for breast cancer samples. TM indicate the melatonin-treated samples and TV indicated vehicle-treated samples (control). All samples showed the RNA Integrity Number (RIN) higher than 8.7, confirming the RNA integrity and quality.
